# Supplementary material for: miRNA-129/FBW7/NF-κB, a Novel Regulatory Pathway in Inflammatory Bowel Disease
Source: PubMed Central journal article supplement — Mol Ther Nucleic Acids. 2019 Nov 30;19:731–40. doi: 10.1016/j.omtn.2019.10.048 (PMC6965515; doi:10.1016/j.omtn.2019.10.048), 2019-11-30
Supplement: mmc1.pdf [file mmc1.pdf]

**OMTN, Volume 19**

## **Supplemental Information**

**miRNA-129/FBW7/NF- $\kappa$ B, a Novel Regulatory**

**Pathway in Inflammatory Bowel Disease**

**Qinghui Meng, Weihua Wu, Tiemin Pei, Junlin Xue, Peng Xiao, Liang Sun, Long Li, and Desen Liang**

**Table S1. Basic characteristic of all subjects included in this study**

| Parameter      | non-IBD     | CD          | UC         |
|----------------|-------------|-------------|------------|
| All (n)        | 189         | 172         | 147        |
| Male           | 107 (56.6%) | 114 (66.3%) | 95 (64.6%) |
| Age (years)    | 41.7 ± 9.5  | 49.4 ± 11.3 | 45.2 ± 8.2 |
| Location       |             |             |            |
| Colon          | 102         | 89          | 78         |
| Rectum         | 51          | 33          | 28         |
| Terminal ileum | 22          | 28          | 26         |
| Ceca           | 14          | 22          | 15         |

IBD, inflammatory bowel disease; CD, Crohn's disease; UC, ulcerative colitis.

**Figure S1**

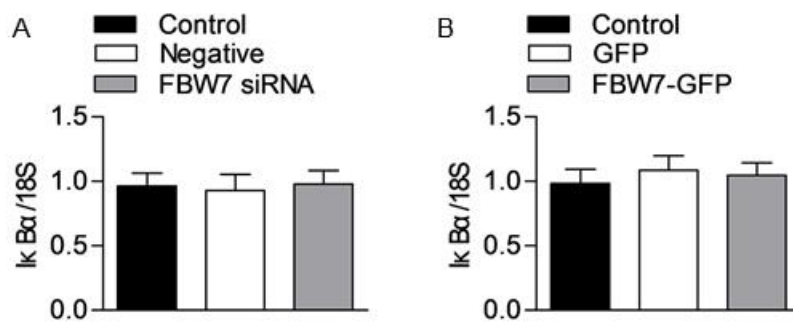

**Figure S1. Knockdown or overexpression of FBW7 had no effect on IκBα mRNA level.** (A and B) RT-PCR analysis of IκBα mRNA expression in Caco-2 cells treated with FBW7 siRNA (A) or FBW7-GFP adenovirus (B). n=6.

**Figure S2**

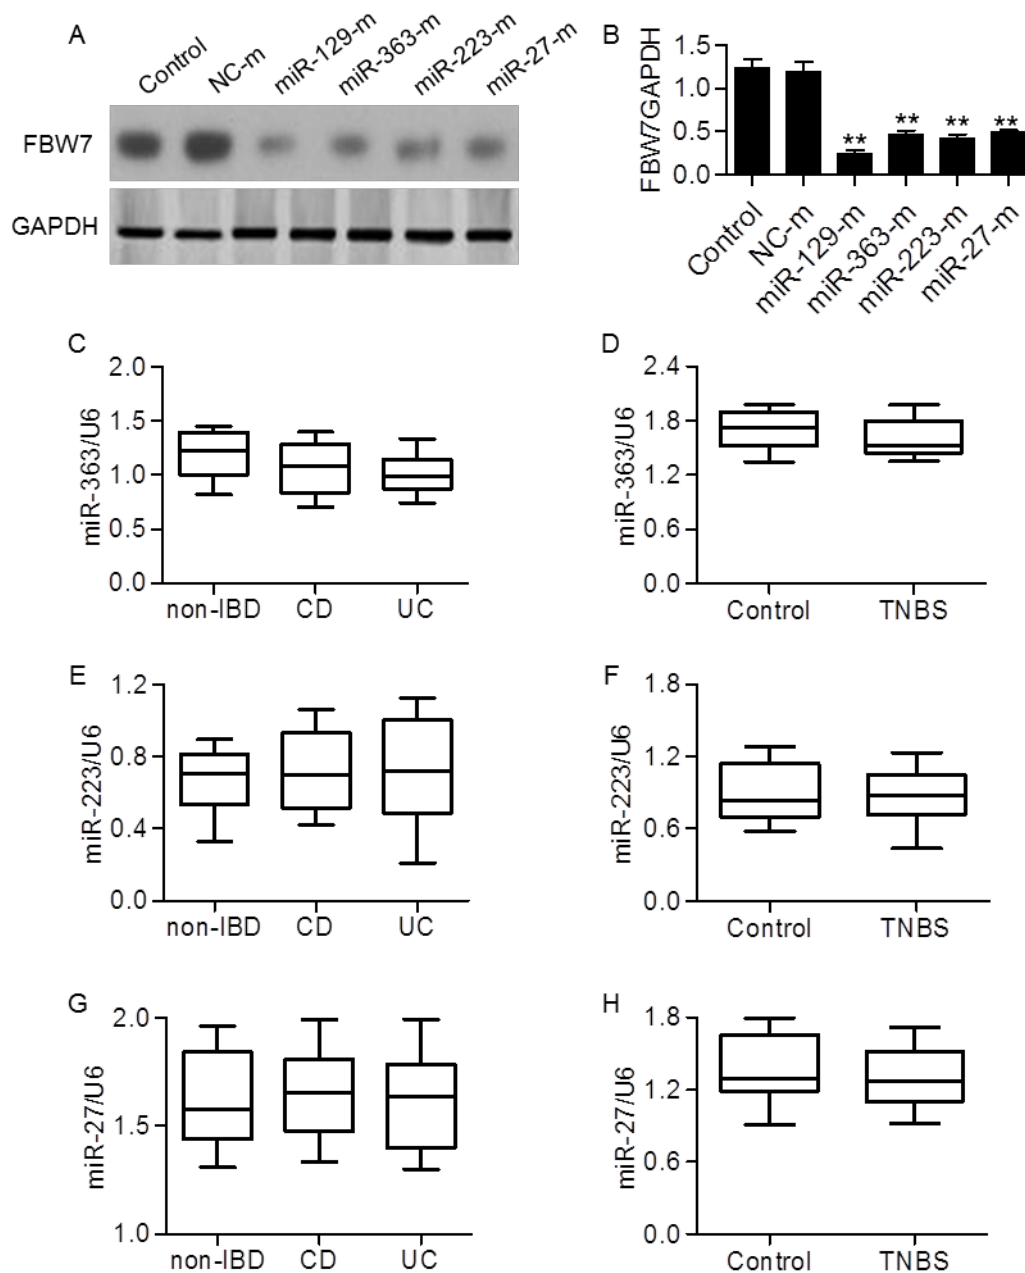

**Figure S2. The expression of FBW7-binding miRNAs in colon tissues of inflammatory bowel disease patients and trinitrobenzene sulphonic acid (TNBS)-induced mouse colitis model.** (A) Western blotting analysis of the extracts from Caco-2 cells transfected with indicated miRNA mimics. (B) Quantification of FBW7 protein level normalized to GAPDH. \*\*P<0.01 vs. control, n=6. (C-H) The expression of miR-363, miR-223 and miR-27a in **non-IBD individuals** (n=189), patients with Crohn's disease (CD, n=172),

patients with ulcerative colitis (UC, n=147), control mice (n=12) and TNBS-treated mice (n=12) was determined by RT-PCR.
